# Supplementary material
Source: MDPI journal article supplement (https://www.mdpi.com/2227-9040/9/5/88)
Supplement: s1 [file s1]

## Article

# Glassy Carbon Electrode Modified with C/Au Nanostructured Materials for Simultaneous Determination of Hydroquinone and Catechol in Water Matrices

Samuel Piña <sup>1,2</sup>, Christian Candia-Onfray <sup>2</sup>, Natalia Hassan <sup>3</sup>, Paola Jara-Ulloa <sup>4</sup>, David Contreras <sup>1</sup> and Ricardo Salazar <sup>2,\*</sup>

<sup>1</sup> Facultad de Ciencias Químicas, Universidad de Concepción (UDEC), Edmundo Larenas 129, 4070371, Concepción, Chile; spina@udec.cl (S.P.); dcontrer@udec.cl (D.C.)

<sup>2</sup> Laboratorio de Electroquímica del Medio Ambiente, LEQMA, Facultad de Química y Biología, Universidad de Santiago de Chile (USACH), Casilla 40, Correo 33, 9160000, Santiago, Chile; christian.candia@usach.cl

<sup>3</sup> Programa Institucional de Fomento a la Investigación, Desarrollo e Innovación, Universidad Tecnológica Metropolitana (UTEM), Ignacio Valdivieso 2409, 8940577, San Joaquín, Santiago, Chile; nhassan@utem.cl

<sup>4</sup> Facultad de Ingeniería y Ciencias, Universidad Adolfo Ibáñez, Diagonal Las Torres 2640, 7941169, Peñalolen, Santiago, Chile; paojara@gmail.com

\* Correspondence: ricardo.salazar@usach.cl

**Citation:** Piña, S.; Candia-Onfray, C.; Hassan, N.; Jara-Ulloa, P.; Contreras, D. Glassy Carbon Electrode Modified with C/Au Nanostructured Materials for Simultaneous Determination of Hydroquinone and Catechol in Water Matrices. *Chemosensors* **2021**, *9*, 88. <https://doi.org/10.3390/chemosensors9050088>

Academic Editor: Filippo Giubileo

Received: 22 March 2021

Accepted: 20 April 2021

Published: 24 April 2021

**Publisher's Note:** MDPI stays neutral with regard to jurisdictional claims in published maps and institutional affiliations.

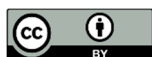

**Copyright:** © 2021 by the authors. Licensee MDPI, Basel, Switzerland. This article is an open access article distributed under the terms and conditions of the Creative Commons Attribution (CC BY) license (<http://creativecommons.org/licenses/by/4.0/>).

## Supplementary Material

**Table S1.** Current and potential values for the oxidation and reduction of HQ using the different systems of CNT. (Scan rate: 50 mV).

| System                  | Oxidation |                  | Reduction |                   | $\Delta E_p$ (V) |
|-------------------------|-----------|------------------|-----------|-------------------|------------------|
|                         | $E_p$ (V) | $I_p$ ( $\mu$ A) | $E_p$ (V) | $I_p$ ( $\mu$ A)  |                  |
| GCE                     | 0.471     | $2.306 \pm 0.04$ | 0.139     | $-1.120 \pm 0.03$ | 0.332            |
| GCE/CNT                 | 0.328     | $23.26 \pm 2.06$ | 0.294     | $-19.99 \pm 2.15$ | 0.034            |
| GCE/CNT-COOH            | 0.348     | $24.18 \pm 2.36$ | 0.286     | $-28.08 \pm 2.41$ | 0.062            |
| GCE/CNT-NH <sub>2</sub> | 0.336     | $29.57 \pm 2.44$ | 0.281     | $-30.33 \pm 2.35$ | 0.055            |

**Table S2.** HQ oxidation peak potentials and currents obtained using the different AuNS and CNT systems.

| System            | $E_p$ (V) | $I_p$ ( $\mu$ A) | System                        | $E_p$ (V) | $I_p$ ( $\mu$ A) |
|-------------------|-----------|------------------|-------------------------------|-----------|------------------|
| GCE/CNT-COOH      | 0.345     | $20.62 \pm 2.41$ | GCE/CNT-NH <sub>2</sub>       | 0.333     | $40.75 \pm 2.47$ |
| GCE/AuNS          | 0.473     | $2.77 \pm 0.03$  | GCE/AuNS                      | 0.474     | $2.22 \pm 0.04$  |
| GCE/CNT-COOH-AuNS | 0.347     | $24.77 \pm 4.11$ | GCE/CNT-NH <sub>2</sub> -AuNS | 0.343     | $45.47 \pm 3.06$ |

**Table S3.** Current values obtained for independently modified electrodes ( $n = 10$ ) for the oxidation of 50.0  $\mu$ M hydroquinone by differential pulse voltammetry.

| Electrode                     | $I$ ( $\mu$ A)  | CV%   |
|-------------------------------|-----------------|-------|
| GCE                           | $1.31 \pm 0.04$ | 3.12  |
| GCE/CNT-NH <sub>2</sub>       | $27.0 \pm 2.43$ | 9.03  |
| GCE/CNT-NH <sub>2</sub> -AuNS | $22.6 \pm 3.06$ | 13.51 |

**Table S4.** Analytical figures of merit of the PLS models constructed for the simultaneous determination of HQ and CT.

| Analyte modeled          | HQ                          | CT        |
|--------------------------|-----------------------------|-----------|
| Data Transformation      | Baseline correction + Log10 |           |
| Data Preprocessing       | Mean Center                 |           |
| Latent variables (k)     | 2                           | 3         |
| % Explained variance     | 87.4                        | 93.9      |
| $n_{\text{calibration}}$ | 21                          | 21        |
| Range ( $\mu$ M)         | 1.2–125.9                   | 6.7–176.9 |
| SEC                      | 19.7                        | 21.6      |
| SEV                      | 21.74                       | 23.51     |
| $r_{\text{val}}$         | 0.869                       | 0.884     |
| $r_{\text{cal}}$         | 0.910                       | 0.921     |
| $n_{\text{validation}}$  | 8                           | 8         |
| SEP                      | 9.9                         | 8.4       |
| $r_{\text{prediction}}$  | 0.758                       | 0.950     |

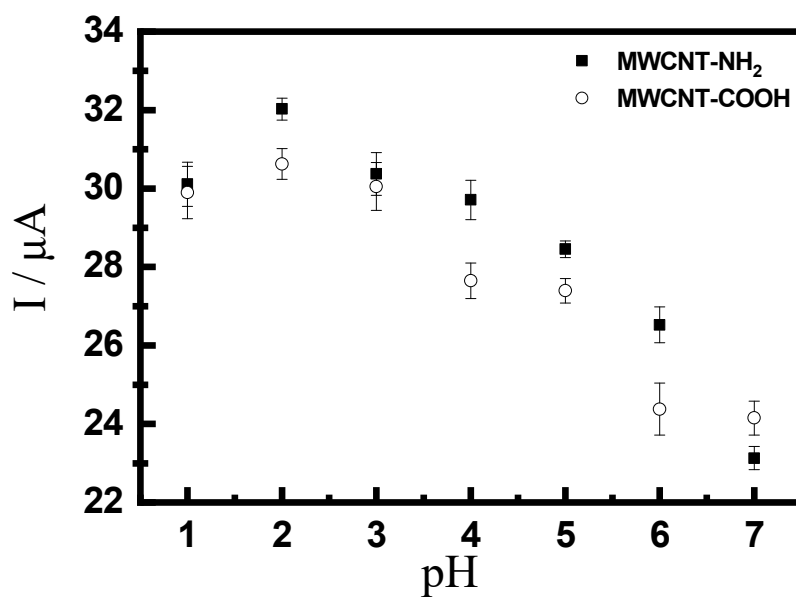

**Figure S1.** Effect of pH on oxidation current intensity of 0.1 mM HQ for GCE/MWCNT-NH<sub>2</sub> and GCE/MWCNT-COOH systems. Working conditions of Cyclic Voltammetry: Scan Speed 50 mV/s, Electrolyte: Buffer Britton-Robinson 0.1 M.

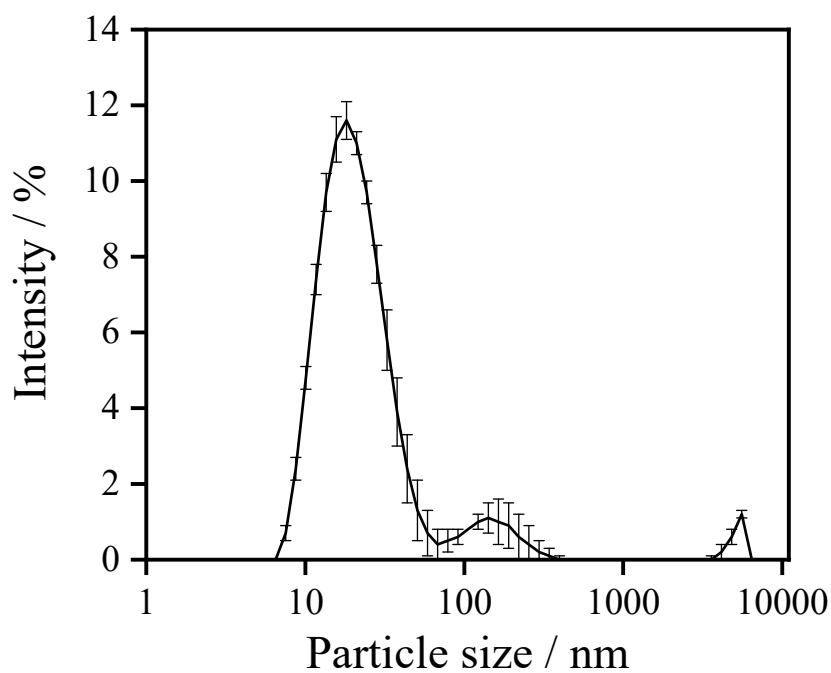

**Figure S2.** Size distribution of AuNS obtained using DLS.
